# Supplementary material for: Alloying design of biodegradable zinc as promising bone implants for load-bearing applications
Source: PubMed Central journal article supplement (PMC6972918; doi:10.1038/s41467-019-14153-7), 2020-01-21
Supplement: 41467_2019_14153_MOESM1_ESM.pdf [file 41467_2019_14153_MOESM1_ESM.pdf]

# Supplementary Information

## **Alloying design of biodegradable zinc as promising bone implants for load-bearing applications**

Yang et al.

## Supplementary Figures

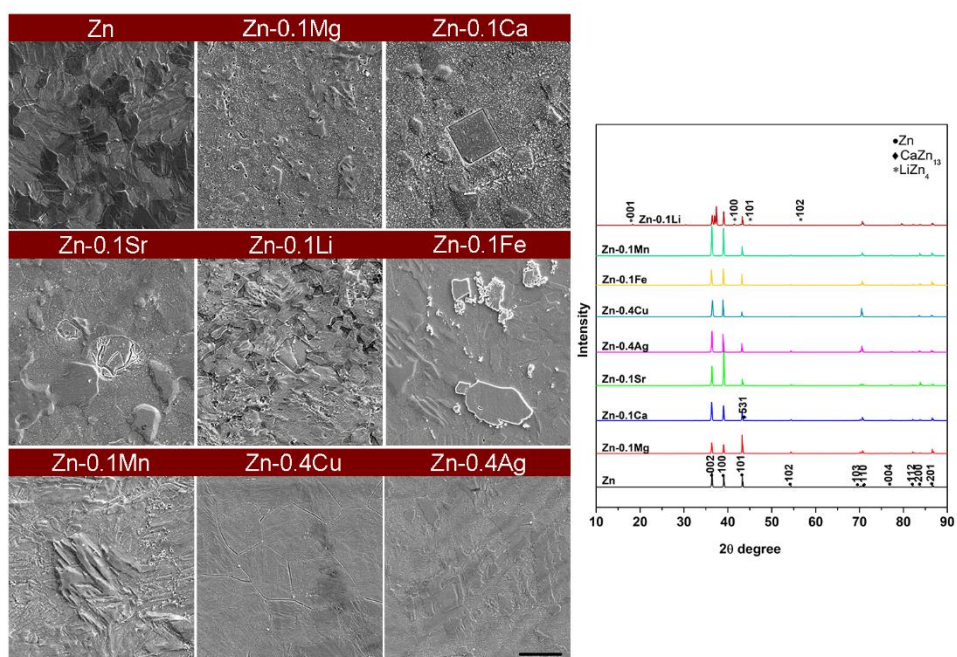

**Supplementary Figure 1.** SEM images and X-ray diffraction (XRD) of pure Zn and binary Zn alloys at the lowest alloy contents. Scale bar, 10  $\mu\text{m}$ . Source data are provided as a Source Data file.

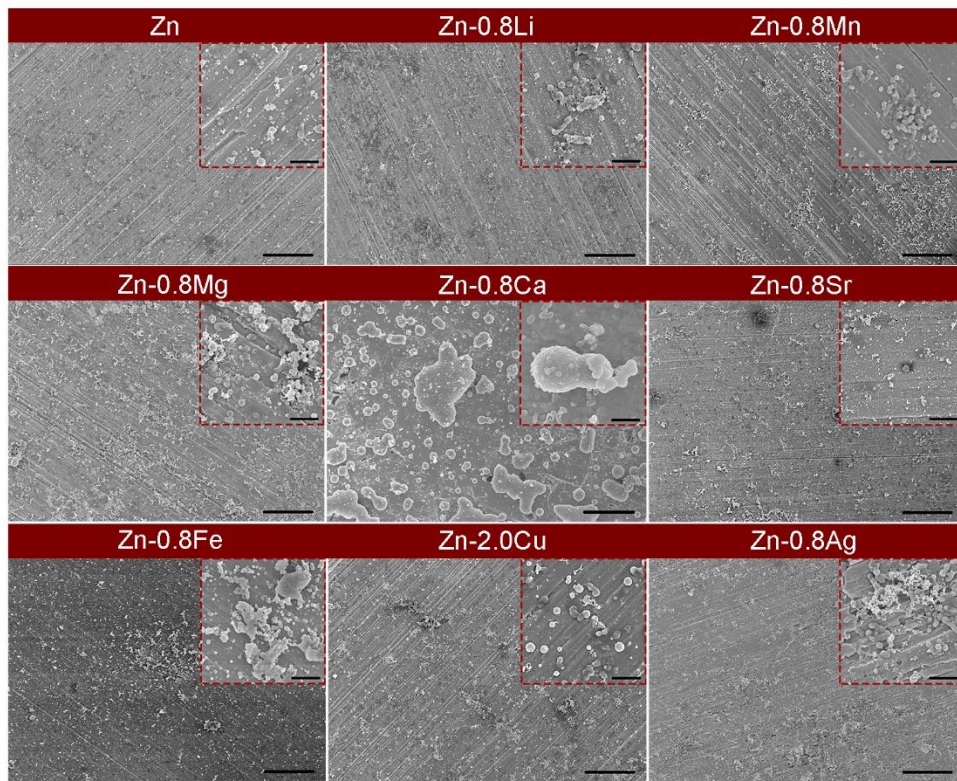

**Supplementary Figure 2.** Corrosion morphology of selected materials after immersion in SBF for 30 days. Scale bar, 20 μm in low magnification, 2 μm in the inserts.

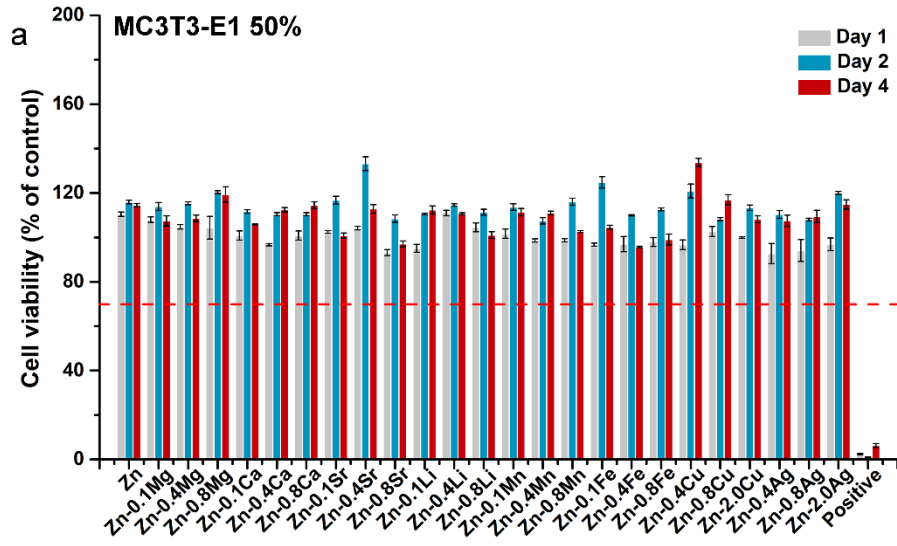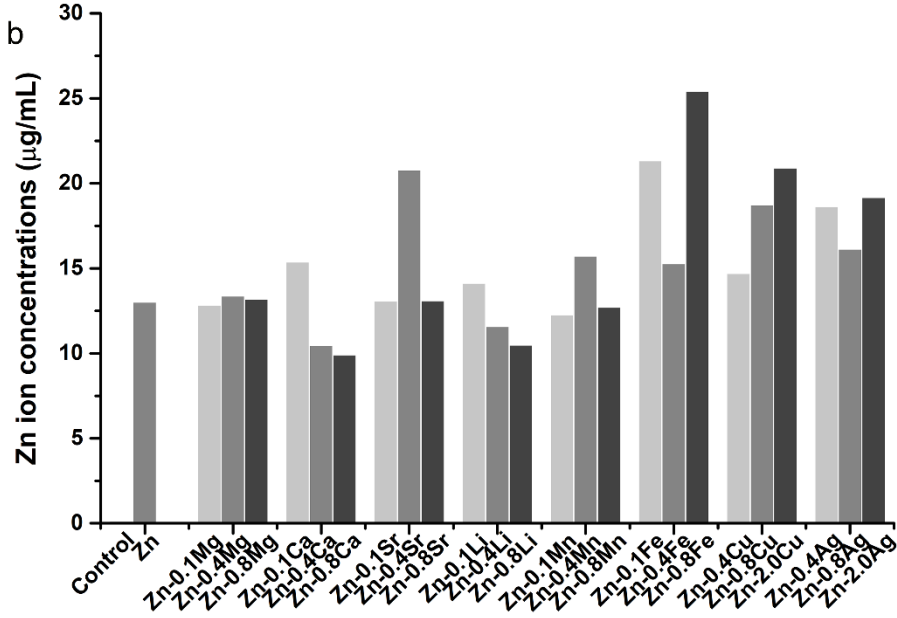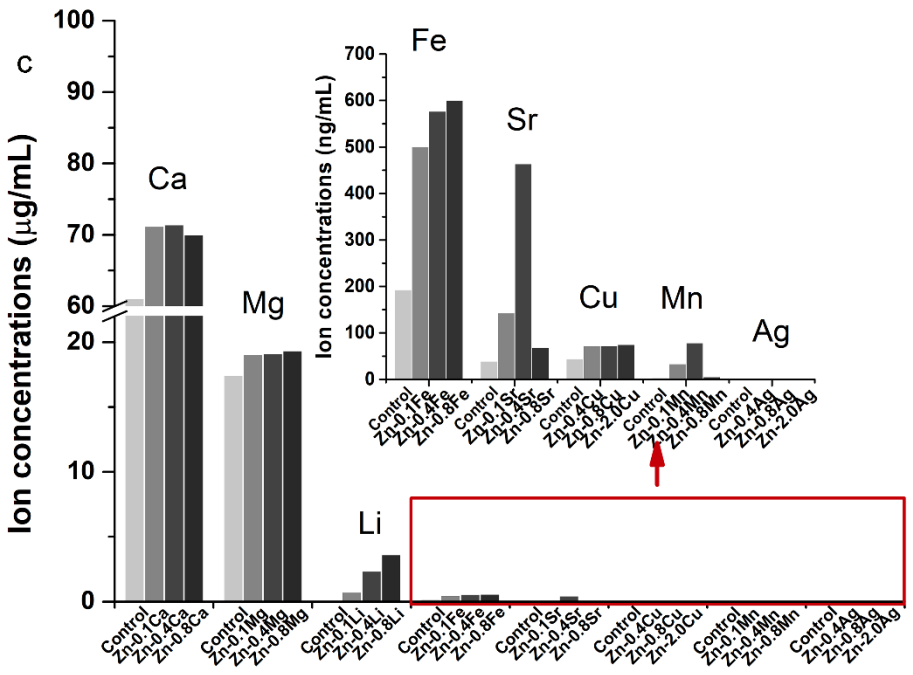

**Supplementary Figure 3.** Cytocompatibility of pure Zn and binary Zn alloys. **a** Cell viability of MC3T3-E1 cells cultured with 50% extracts. **b** Zn ion concentrations and **c** alloying element ion concentrations in 100% extracts. Error bars indicate mean  $\pm$  standard deviation (n=3, independent samples). \* $P < 0.05$  by one-way ANOVA with Tukey's post hoc test, compared with Zn. The red dashed line indicates the cut-off between non-toxic and toxic responses according to ISO 10993-5. Source data are provided as a Source Data file.

## Supplementary Tables

**Supplementary Table 1** Chemical composition of pure Zn and binary Zn alloys

| Materials | Composition (wt. %) |       |
|-----------|---------------------|-------|
|           | Alloy contents      | Zn    |
| Pure Zn   | -                   | 99.99 |
| Zn-0.1Sr  | 0.11                | Bal.  |
| Zn-0.4Sr  | 0.42                | Bal.  |
| Zn-0.8Sr  | 0.77                | Bal.  |
| Zn-0.1Ca  | 0.14                | Bal.  |
| Zn-0.4Ca  | 0.38                | Bal.  |
| Zn-0.8Ca  | 0.76                | Bal.  |
| Zn-0.1Mg  | 0.14                | Bal.  |
| Zn-0.4Mg  | 0.43                | Bal.  |
| Zn-0.8Mg  | 0.77                | Bal.  |
| Zn-0.1Li  | 0.13                | Bal.  |
| Zn-0.4Li  | 0.44                | Bal.  |
| Zn-0.8Li  | 0.79                | Bal.  |
| Zn-0.1Fe  | 0.11                | Bal.  |
| Zn-0.4Fe  | 0.43                | Bal.  |
| Zn-0.8Fe  | 0.81                | Bal.  |
| Zn-0.1Mn  | 0.11                | Bal.  |
| Zn-0.4Mn  | 0.37                | Bal.  |
| Zn-0.8Mn  | 0.79                | Bal.  |
| Zn-0.4Ag  | 0.43                | Bal.  |
| Zn-0.8Ag  | 0.82                | Bal.  |
| Zn-2.0Ag  | 1.92                | Bal.  |
| Zn-0.4Cu  | 0.45                | Bal.  |
| Zn-0.8Cu  | 0.85                | Bal.  |
| Zn-2.0Cu  | 1.98                | Bal.  |

**Supplementary Table 2** Chemical composition of ternary Zn alloys

| Materials      | Composition (wt. %) |      |      |      |
|----------------|---------------------|------|------|------|
|                | Li                  | Mg   | Mn   | Zn   |
| Zn-0.1Li-0.4Mg | 0.11                | 0.38 | -    | Bal. |
| Zn-0.1Li-0.8Mg | 0.10                | 0.82 | -    | Bal. |
| Zn-0.4Li-0.4Mg | 0.38                | 0.39 | -    | Bal. |
| Zn-0.4Li-0.8Mg | 0.39                | 0.78 | -    | Bal. |
| Zn-0.8Li-0.4Mg | 0.78                | 0.39 | -    | Bal. |
| Zn-0.8Li-0.8Mg | 0.79                | 0.80 | -    | Bal. |
| Zn-0.1Li-0.1Mn | 0.11                | -    | 0.12 | Bal. |
| Zn-0.1Li-0.4Mn | 0.10                | -    | 0.42 | Bal. |
| Zn-0.1Li-0.8Mn | 0.10                | -    | 0.78 | Bal. |
| Zn-0.4Li-0.1Mn | 0.38                | -    | 0.12 | Bal. |
| Zn-0.4Li-0.4Mn | 0.38                | -    | 0.38 | Bal. |
| Zn-0.4Li-0.8Mn | 0.37                | -    | 0.81 | Bal. |
| Zn-0.8Li-0.1Mn | 0.76                | -    | 0.12 | Bal. |
| Zn-0.8Li-0.4Mn | 0.80                | -    | 0.38 | Bal. |
| Zn-0.8Li-0.8Mn | 0.81                | -    | 0.77 | Bal. |

**Supplementary Table 3** Electrochemical parameters for pure Zn and binary Zn alloys in SBF solution

| Materials | $I_{\text{corr}}$ ( $\mu\text{A}\cdot\text{cm}^{-2}$ ) | $E_{\text{corr}}$ (V) | Corrosion rate ( $\text{mm}\cdot\text{year}^{-1}$ ) |
|-----------|--------------------------------------------------------|-----------------------|-----------------------------------------------------|
| Pure zinc | 8.523 (1.077)                                          | -0.995 (0.004)        | 0.254 (0.032)                                       |
| Zn-0.1Mg  | 16.040 (3.683)                                         | -1.087 (0.060)        | 0.408 (0.129)                                       |
| Zn-0.4Mg  | 13.470 (1.296)                                         | -1.118 (0.002)        | 0.401 (0.039)                                       |
| Zn-0.8Mg  | 15.245 (1.816)*                                        | -1.022 (0.072)        | 0.454 (0.054)*                                      |
| Zn-0.1Ca  | 17.837 (5.663)*                                        | -1.185 (0.024)        | 0.531 (0.169)*                                      |
| Zn-0.4Ca  | 7.461 (1.725)                                          | -0.983 (0.005)        | 0.222 (0.051)                                       |
| Zn-0.8Ca  | 10.489 (0.114)                                         | -1.202 (0.014)        | 0.312 (0.004)                                       |
| Zn-0.1Sr  | 7.050 (0.895)                                          | -1.017 (0.013)        | 0.210 (0.027)                                       |
| Zn-0.4Sr  | 20.562 (2.592)*                                        | -1.134 (0.007)        | 0.612 (0.077)*                                      |
| Zn-0.8Sr  | 27.817 (3.234)*                                        | -1.141 (0.013)        | 0.828 (0.096)*                                      |
| Zn-0.1Li  | 15.365 (1.614)*                                        | -1.038 (0.009)        | 0.457 (0.048)*                                      |
| Zn-0.4Li  | 11.339 (3.290)                                         | -1.025 (0.023)        | 0.338 (0.098)                                       |
| Zn-0.8Li  | 30.407 (2.750)*                                        | -1.112 (0.007)        | 0.905 (0.082)*                                      |
| Zn-0.1Mn  | 5.374 (0.259)*                                         | -0.951 (0.049)        | 0.160 (0.008)*                                      |
| Zn-0.4Mn  | 7.220 (3.034)                                          | -0.961 (0.028)        | 0.190 (0.122)                                       |
| Zn-0.8Mn  | 7.243 (0.753)                                          | -0.984 (0.008)        | 0.108 (0.011)                                       |
| Zn-0.1Fe  | 49.376 (17.381)*                                       | -1.141 (0.007)        | 1.470 (0.518)*                                      |
| Zn-0.4Fe  | 9.304 (1.311)                                          | -1.043 (0.003)        | 0.277 (0.039)                                       |
| Zn-0.8Fe  | 55.591 (13.755)*                                       | -1.126 (0.011)        | 1.656 (0.409)*                                      |
| Zn-0.4Cu  | 7.652 (0.872)                                          | -0.976 (0.022)        | 0.228 (0.026)                                       |
| Zn-0.8Cu  | 37.153 (7.213)*                                        | -1.103 (0.003)        | 1.106 (0.214)*                                      |
| Zn-2.0Cu  | 31.518 (4.012)*                                        | -1.108 (0.004)        | 0.938 (0.119)*                                      |
| Zn-0.4Ag  | 35.625 (4.489)*                                        | -1.047 (0.083)        | 1.061 (0.133)*                                      |
| Zn-0.8Ag  | 45.991 (4.195)*                                        | -1.095 (0.005)        | 1.369 (0.124)*                                      |
| Zn-2.0Ag  | 17.291 (2.630)*                                        | -1.061 (0.091)        | 0.515 (0.078)*                                      |

Numbers in the brackets represent the standard deviation (n=3, independent samples), \* $P<0.05$  by one-way ANOVA with Tukey's post hoc test, compared with pure Zn. Source data are provided as a Source Data file.
